# Supplementary material for: BNT162b2 mRNA COVID-19 Vaccine Does Not Impact the Honeymoon Phase in Type 1 Diabetes: A Case Report
Source: MDPI journal article supplement (doi:10.3390/vaccines10071096), 2022-07-08
Supplement: s1 [file s1]

## Supplementary Materials

**Table S1.** Anthropometric parameters, blood pressure values and markers of glucose homeostasis, residual beta-cell function and beta-cell autoimmunity during the follow-up period.

| Parameter                                                     | T1D onset                                                                        | 2 months after the T1D onset                                | 14 months after the T1D onset                               | 19 months after the T1D onset (3 months after the second COVID-19 vaccine dose) |
|---------------------------------------------------------------|----------------------------------------------------------------------------------|-------------------------------------------------------------|-------------------------------------------------------------|---------------------------------------------------------------------------------|
| Body weight (Kg)                                              | 69                                                                               | 71.5                                                        | 67.5                                                        | 68.5                                                                            |
| BMI (Kg/m <sup>2</sup> )                                      | 22.5                                                                             | 23.3                                                        | 21.8                                                        | 22.1                                                                            |
| Blood pressure (mmHg)                                         | 130/90                                                                           | 120/60                                                      | 110/70                                                      | 120/70                                                                          |
| HbA1c (%; mmol/mol)                                           | 13.2% (121 mmol/mol)                                                             | 5.3% (34 mmol/mol)                                          | 5.2% (33 mmol/mol)                                          | 5.7% (39 mmol/mol)                                                              |
| Total daily insulin dose (TDI)                                | 0.7 IU/ body weight/24 hours (after DKA resolution; basal-bolus insulin therapy) | 0.09 IU/Kg body weight/24 hours (insulin degludec 7 IU/day) | 0.10 IU/Kg body weight/24 hours (insulin degludec 7 IU/day) | 0.10 IU/Kg body weight/24 hours (insulin degludec 7 IU/day)                     |
| IDAA1c                                                        | Not applicable                                                                   | 5.6                                                         | 5.6                                                         | 6.1                                                                             |
| Fasting capillary blood ketones (mmol/L)                      | >3.0                                                                             | 0.3                                                         | 0.2                                                         | 0.3                                                                             |
| Fasting plasma C-peptide (ng/mL) (reference range: 0.78–5.19) | 0.22                                                                             | 0.74                                                        | 0.87                                                        | 0.28                                                                            |
| 30-min (MMTT) plasma C-peptide (ng/mL)                        | n/a                                                                              | 1.89                                                        | 1.52                                                        | 0.90                                                                            |
| 60-min (MMTT) plasma C-peptide (ng/mL)                        | n/a                                                                              | 2.53                                                        | 1.62                                                        | 1.25                                                                            |
| 90-min (MMTT) plasma C-peptide (ng/mL)                        | n/a                                                                              | 2.95                                                        | 1.69                                                        | 1.52                                                                            |
| 120-min (MMTT) plasma C-peptide (ng/mL)                       | n/a                                                                              | 2.53                                                        | 1.78                                                        | 2.00                                                                            |
| Fasting plasma glucose (mg/dL)                                | 501                                                                              | 80                                                          | 72                                                          | 72                                                                              |
| 30-min (MMTT) plasma glucose (mg/dL)                          | n/a                                                                              | 203                                                         | 146                                                         | 170                                                                             |
| 60-min (MMTT) plasma glucose (mg/dL)                          | n/a                                                                              | 151                                                         | 183                                                         | 235                                                                             |
| 90-min (MMTT) plasma glucose (mg/dL)                          | n/a                                                                              | 110                                                         | 165                                                         | 261                                                                             |
| 120-min (MMTT) plasma glucose (mg/dL)                         | n/a                                                                              | 81                                                          | 182                                                         | 250                                                                             |

|                                                                     |        |      |        |      |
|---------------------------------------------------------------------|--------|------|--------|------|
| Fasting C-peptide index                                             | 0.04   | 0.92 | 1.20   | 0.38 |
| 30-min (MMTT) C-peptide index                                       | n/a    | 0.93 | 1.04   | 0.52 |
| 60-min (MMTT) C-peptide index                                       | n/a    | 1.67 | 0.88   | 0.53 |
| 90-min (MMTT) C-peptide index                                       | n/a    | 2.68 | 1.02   | 0.58 |
| 120-min (MMTT) C-peptide index                                      | n/a    | 3.12 | 0.97   | 0.80 |
| GADA<br>(reference range: 0.00–5.00 AU/mL)                          | 24.6   | n/a  | 26.0   | 26.3 |
| IAA<br>(reference range: 0.00–9.00 U/mL)                            | 5.1    | n/a  | 1.8    | 0.4  |
| IA2A<br>(cut-off for positivity: $\geq 7.4$ U/mL)                   | >350.0 | n/a  | 201.10 | n/a  |
| ZnT8A<br>(cut-off for positivity: $\geq 14.9$ U/mL)                 | 18.9   | n/a  | 9.60   | n/a  |
| ICA<br>(cut-off for negativity - indirect immunofluorescence: <1:5) | <1:5   | n/a  | <1:5   | <1:5 |
| Serum 25-hydroxyvitamin D levels (ng/mL)                            | n/a    | 28.0 | 57     | 45   |

IDAA1c (Insulin-Dose Adjusted HbA1c) was calculated through the following formula:  $\text{HbA1c (\%)} + 4 \times [\text{insulin dose (units per kilogram per 24 h)}]$ . A calculated IDAA1C value of  $\leq 9$  was used to define the partial remission [ref. 21]. 120-minute-mixed meal tolerance tests (MMTTs) were performed via oral administration of Ensure Plus®, Abbott (360 mL) for the assessment of residual beta-cell function. C-peptide index (also referred to as C-peptide to glucose ratio) was assessed in fasting and (MMTT)-postprandial states, and was calculated through the following formula:  $\text{C-peptide (ng/mL)} / \text{glucose (mg/dL)} \times 100$  [ref. 23]. **Abbreviations:** BMI, body mass index; GADA, glutamic acid decarboxylase autoantibodies; HbA1c, glycated hemoglobin; IAA, insulin autoantibodies; IA2A, islet tyrosine phosphatase 2 autoantibodies; ICA, islet-cell antibodies; IDAA1c, Insulin-Dose Adjusted HbA1c; MMTT, mixed meal tolerance test; n/a, not available; T1D, type 1 diabetes; ZnT8A, zinc transporter 8 autoantibodies.

**Table S2.** Laboratory tests (other than markers of glucose homeostasis, residual beta-cell function and beta-cell autoimmunity) performed at 2 months, 14 months and 19 months from the clinical onset of type 1 diabetes (T1D).

| Laboratory parameter *                                                   | 2 months after the T1D onset              | 14 months after the T1D onset             | 19 months after the T1D onset **          |
|--------------------------------------------------------------------------|-------------------------------------------|-------------------------------------------|-------------------------------------------|
| WBC count<br>( $4.00\text{--}10.00 \times 10^3/\mu\text{L}$ )            | $5.34 \times 10^3/\mu\text{L}$            | $5.71 \times 10^3/\mu\text{L}$            | $6.23 \times 10^3/\mu\text{L}$            |
| Neutrophils<br>( $1.8\text{--}7.0 \times 10^3/\mu\text{L}$ ; 40.0–75.0%) | $2.80 \times 10^3/\mu\text{L}$<br>(52.2%) | $3.01 \times 10^3/\mu\text{L}$<br>(52.8%) | $3.12 \times 10^3/\mu\text{L}$<br>(50.0%) |

|                                                          |                                     |                                      |                                      |
|----------------------------------------------------------|-------------------------------------|--------------------------------------|--------------------------------------|
| Lymphocytes<br>(1.0–4.8×10 <sup>3</sup> /μL; 19.0–48.0%) | 2.10×10 <sup>3</sup> /μL<br>(40.0%) | 2.19×10 <sup>3</sup> /μL<br>(38.40%) | 2.59×10 <sup>3</sup> /μL<br>(41.50%) |
| Monocytes<br>(0.1–0.8×10 <sup>3</sup> /μL; <12.0%)       | 0.3×10 <sup>3</sup> /μL<br>(5.0%)   | 0.36×10 <sup>3</sup> /μL<br>(6.3%)   | 0.38×10 <sup>3</sup> /μL<br>(6.2%)   |
| Eosinophils<br>(0.0–0.5×10 <sup>3</sup> /μL; <6.0%)      | 0.1×10 <sup>3</sup> /μL<br>(1.7%)   | 0.12×10 <sup>3</sup> /μL<br>(2.1%)   | 0.08×10 <sup>3</sup> /μL<br>(1.3%)   |
| Basophils<br>(0.0–0.2×10 <sup>3</sup> /μL; <2.0%)        | 0.1×10 <sup>3</sup> /μL<br>(1.0%)   | 0.03×10 <sup>3</sup> /μL<br>(0.5%)   | 0.07×10 <sup>3</sup> /μL<br>(1.1%)   |
| RBC count<br>(4.40–5.90×10 <sup>6</sup> /μL)             | 5.21×10 <sup>6</sup> /μL            | 5.07×10 <sup>6</sup> /μL             | 5.11×10 <sup>6</sup> /μL             |
| Hb<br>(14.0–18.0 g/dL)                                   | 15.7 g/dL                           | 15.1 g/dL                            | 15.3 g/dL                            |
| Ht<br>(41–51%)                                           | 46%                                 | 43.2%                                | 44.5%                                |
| MCV<br>(82.0–98.0 fl)                                    | 88.9 fl                             | 85.2 fl                              | 87.0 fl                              |
| MCH<br>(27.0–34.0 pg)                                    | 30.1 pg                             | 29.7 pg                              | 29.9 pg                              |
| MCHC<br>(32.0–36.0 g/dL)                                 | 33.9 g/dL                           | 34.9 g/dL                            | 34.3 g/dL                            |
| Platelet count<br>(150–450×10 <sup>3</sup> /μL)          | 153×10 <sup>3</sup> /μL             | 160×10 <sup>3</sup> /μL              | 163×10 <sup>3</sup> /μL              |
| BUN<br>(19–44 mg/dL)                                     | 35 mg/dL                            | 38 mg/dL                             | 39 mg/dL                             |
| Creatinine<br>(0.73–1.18 mg/dL)                          | 1.05 mg/dL                          | 0.84 mg/dL                           | 1.13 mg/dL                           |
| eGFR (CKD-EPI)                                           | 100.3 mL/min/1.73m <sup>2</sup>     | 122.6 mL/min/1.73m <sup>2</sup>      | 90.5 mL/min/1.73m <sup>2</sup>       |
| Uric acid<br>(3.57–7.20 mg/dL)                           | 5.5 mg/dL                           | 5.0 mg/dL                            | 5.0 mg/dL                            |
| Total serum protein<br>level<br>(60–80 g/L)              | 65 g/L                              | 63 g/L                               | 68 g/L                               |
| Total bilirubin<br>(<1.20 mg/dL)                         | 0.63 mg/dL                          | 0.54 mg/dL                           | 1.15 mg/dL                           |
| Direct bilirubin<br>(<0.5 mg/dL)                         | 0.36 mg/dL                          | 0.25 mg/dL                           | 0.40 mg/dL                           |
| AST<br>(5–34 U/L)                                        | 19 U/L                              | 22 U/L                               | 23 U/L                               |
| ALT<br>(0–55 U/L)                                        | 13 U/L                              | 11 U/L                               | 14 U/L                               |
| GGT<br>(12–64 U/L)                                       | 12 U/L                              | 12 U/L                               | 13 U/L                               |
| ALP                                                      |                                     |                                      | 48 U/L                               |

|                                                             |             |             |             |
|-------------------------------------------------------------|-------------|-------------|-------------|
| (40–150 U/L)                                                | 58 U/L      | 62 U/L      |             |
| Sodium<br>(135–145 mmol/L)                                  | 142 mmol/L  | 141 mmol/L  | 139 mmol/L  |
| Potassium<br>(3.5–5.1 mmol/L)                               | 3.63 mmol/L | 3.8 mmol/L  | 3.7 mmol/L  |
| Calcium<br>(8.4–10.2 mg/dL)                                 | 8.9 mg/dL   | 8.8 mg/dL   | 9.4 mg/dL   |
| Phosphorus<br>(2.3–4.7 mg/dL)                               | 3.3 mg/dL   | 3.3 mg/dL   | 4.0 mg/dL   |
| Magnesium<br>(1.6–2.6 mg/dL)                                | 2.2 mg/dL   | 2.3 mg/dL   | 2.2 mg/dL   |
| Serum iron<br>(65–175 µg/dL)                                | 70 µg/dL    | 68 µg/dL    | 155 µg/dL   |
| Transferrin<br>(174–364 mg/dL)                              | 211 mg/dL   | 219 mg/dL   | 213 mg/dL   |
| Ferritin<br>(21.8–275 ng/mL)                                | 132 ng/mL   | 100 ng/mL   | 107 ng/mL   |
| Albumin<br>(35–50 g/L)                                      | 42 g/L      | 42.8 g/L    | 46.6 g/L    |
| Total cholesterol<br>(<200 mg/dL)                           | 146 mg/dL   | 132 mg/dL   | 160 mg/dL   |
| HDL-cholesterol<br>(>40 mg/dL)                              | 42 mg/dL    | 49 mg/dL    | 54 mg/dL    |
| LDL-cholesterol<br>(<130 mg/dL)                             | 95 mg/dL    | 77 mg/dL    | 102 mg/dL   |
| Triglycerides<br>(<150 mg/dL)                               | 46 mg/dL    | 38 mg/dL    | 26 mg/dL    |
| TSH<br>(0.35–4.94 µIU/mL)                                   | 1.07 µIU/mL | 1.41 µIU/mL | 1.26 µIU/mL |
| FT3<br>(1.72–3.54 pg/mL)                                    | 2.74 pg/mL  | 2.46 pg/mL  | 2.83 pg/mL  |
| FT4<br>(0.7–1.48 ng/dL)                                     | 0.90 ng/dL  | 0.88 ng/dL  | 1.04 ng/dL  |
| Anti-thyroid peroxidase (TPO) antibodies<br>(0.0–5.6 IU/mL) | 0.0 IU/mL   | n/a         | 0.2 IU/mL   |
| Antithyroglobulin antibodies<br>(0.0–4.1 IU/mL)             | 2.0 IU/mL   | n/a         | 0.9 IU/mL   |
| Tissue transglutaminase IgA antibodies<br>(<10 AU/mL)       | 2.40 AU/mL  | 2.30 AU/mL  | 2.50 AU/mL  |
| Total IgA<br>(0.70–3.78 g/L)                                | n/a         | 1.15 g/L    | 1.10 g/L    |
| Total testosterone<br>(2.40–8.70 ng/mL)                     | 4.02 ng/mL  | 4.38 ng/mL  | 3.37 ng/mL  |
| Serum cortisol - 08:00 AM                                   | n/a         | 13.3 µg/dL  | n/a         |

|                                     |                                                                                                        |                                                                                                        |                                                                                                        |
|-------------------------------------|--------------------------------------------------------------------------------------------------------|--------------------------------------------------------------------------------------------------------|--------------------------------------------------------------------------------------------------------|
| (3.7–19.4 µg/dL)                    |                                                                                                        |                                                                                                        |                                                                                                        |
| ACTH - 08:00 AM<br>(4.7–48.8 pg/mL) | n/a                                                                                                    | 15 pg/mL                                                                                               | n/a                                                                                                    |
| Folate<br>(3.1–20.5 ng/mL)          | 5.5 ng/mL                                                                                              | 4.8 ng/mL                                                                                              | 9.2 ng/mL                                                                                              |
| Vitamin B12<br>(187–883 pg/mL)      | 442 pg/mL                                                                                              | 389 pg/mL                                                                                              | 509 pg/mL                                                                                              |
| 25(OH)D<br>(≥30 ng/mL)              | 28 ng/mL                                                                                               | 57 ng/mL                                                                                               | 45 ng/mL                                                                                               |
| PTH<br>(15.0–83.1 pg/mL)            | n/a                                                                                                    | 40.6 pg/mL                                                                                             | 48.6 pg/mL                                                                                             |
| Urinalysis                          | Absence of glucose, proteins, ketones and nitrites in urine; Albumin-to-creatinine ratio (ACR) 15 mg/g | Absence of glucose, proteins, ketones and nitrites in urine; Albumin-to-creatinine ratio (ACR) 15 mg/g | Absence of glucose, proteins, ketones and nitrites in urine; Albumin-to-creatinine ratio (ACR) 15 mg/g |

\* Reference ranges at our Institution are shown in brackets. \*\* 3 months after the second COVID-19 vaccine dose injection. **Abbreviations:** 25(OH)D, 25-hydroxyvitamin D; ACTH, adrenocorticotrophic hormone; ALP, alkaline phosphatase; ALT, alanine aminotransferase; AST, aspartate aminotransferase; BUN, blood urea nitrogen; eGFR (CKD-EPI), estimated glomerular filtration rate calculated through the CKD-EPI (Chronic Kidney Disease Epidemiology Collaboration) equation; FT3, free triiodothyronine; FT4, free thyroxine; GGT, gamma-glutamyl transferase; Hb, hemoglobin; HDL-cholesterol, high-density lipoprotein cholesterol; Ht, hematocrit; IgA, Immunoglobulin A; LDL-cholesterol, low-density lipoprotein cholesterol; MCH, mean corpuscular hemoglobin; MCHC, mean corpuscular hemoglobin concentration; MCV, mean corpuscular volume; PTH, parathyroid hormone; RBC, red blood cell count; TSH, thyroid-stimulating hormone; WBC, white blood cell count.

**Table S3.** Summary of the main continuous glucose monitoring (CGM) metrics during different periods before and after COVID-19 vaccination.

| CGM metrics       | 23 Nov 2021 - 13 Dec 2021<br>(21 days before the first vaccine dose) | 14 Dec 2021 - 3 Jan 2022<br>(21 days after the first vaccine dose) | 4 Jan 2022 - 24 Jan 2022<br>(21 days after the second vaccine dose) | 25 Jan 2022 - 14 Feb 2022<br>(21 days following the first 3 weeks after the second vaccine dose) |
|-------------------|----------------------------------------------------------------------|--------------------------------------------------------------------|---------------------------------------------------------------------|--------------------------------------------------------------------------------------------------|
| TIR 70–180 mg/dL  | 90%                                                                  | 87%                                                                | 74%                                                                 | 88%                                                                                              |
| TAR 181–250 mg/dL | 8%                                                                   | 11%                                                                | 19%                                                                 | 9%                                                                                               |
| TAR>250 mg/dL     | 2%                                                                   | 2%                                                                 | 7%                                                                  | 2%                                                                                               |
| TBR 54–69 mg/dL   | 0%                                                                   | 0%                                                                 | 0%                                                                  | 1%                                                                                               |
| TBR<54 mg/dL      | 0%                                                                   | 0%                                                                 | 0%                                                                  | 0%                                                                                               |

|                                   |                    |                    |                    |                    |
|-----------------------------------|--------------------|--------------------|--------------------|--------------------|
| GMI                               | 6.4% (47 mmol/mol) | 6.6% (49 mmol/mol) | 7.0% (53 mmol/mol) | 6.3% (46 mmol/mol) |
| Glycemic variability (%CV)        | 29.9%              | 28.8%              | 32.8%              | 33.0%              |
| Percentage of time CGM was active | 91%                | 92%                | 83%                | 79%                |

**Abbreviations:** CV, coefficient of variation; GMI, Glucose Management Indicator (also referred to as estimated A1C or eA1C); TAR, time above range; TBR, time below range; TIR, time in range.
